# Supplementary material for: Structure and diversity of microbial communities in the rhizosphere soil of Trichosanthes kirilowii from different cultivation patterns
Source: PeerJ. 2025 Nov 27;13:e20459. doi: 10.7717/peerj.20459 (PMC12665268; doi:10.7717/peerj.20459)
Supplement: Supplemental Information 1 [file peerj-13-20459-s001.xlsx]

## Sheet: Sheet1
	Pattern	SOM（g/kg）	AN（mg/kg）	AP（mg/kg）	AK（mg/kg）	TN（g/kg）	TP（g/kg）	TK（g/kg）	pH
	TM1	20.32	41.97	26.47	109.72	0.65	1.1	11.64	8.56
	TM2	20.44	41.3	37.49	121.58	0.71	1.12	12.28	8.61
	TM3	21.51	42.39	24.18	120.6	0.68	0.94	14.13	8.71
