# Supplementary material for: Structure and diversity of microbial communities in the rhizosphere soil of Trichosanthes kirilowii from different cultivation patterns
Source: PeerJ. 2025 Nov 27;13:e20459. doi: 10.7717/peerj.20459 (PMC12665268; doi:10.7717/peerj.20459)
Supplement: Supplemental Information 2 [file peerj-13-20459-s002.xlsx]

## Sheet: Sheet1
	Phylun	TM1	TM2	TM3
	Bacteroidota(%)	5.33	7.8	7.04
	Chloroflexi(%)	4.36	5.76	8.59
	Nitrospirota(%)	2.02	1.86	2.21
	Genus	TM1	TM2	TM3
	Nitrosospira(%)	0.038	0.063	0.049
	Bryobacter(%)	0.295	0.595	0.414
	Pseudarthrobacter(%)	0.596	0.745	0.814
	unclassified_Steroidobacteraceae(%)	0.306	0.457	0.43
	Nocardioides(%)	0.292	0.584	0.459
	Agromyces(%)	0.13	0.199	0.146
	Genus	TM1	TM2	TM3
	Fusarium(%)	7.51	2.824	1.206
	Stagonosporopsis(%)	0.961	0.836	0.499
	Rhizoctonia(%)	1.576	0.302	0.022
	Colletotrichum(%)	0.919	0.701	0.336
	Ceratobasidium(%)	2.037	0.903	0.021
	Plectosphaerella(%)	2.669	1.473	0.829
